# Supplementary material
Source: Springer Nature journal article supplement (https://www.springermedizin.de/resource/supplementary/12916_2006_96_MOESM13_ESM.pdf/9599160)
Supplement: MOESM13 [file 9599160]

## Control graph

6.9 HOSPITAL SEPARATIONS, Cause of Injury or Poisoning(a)—1998–99

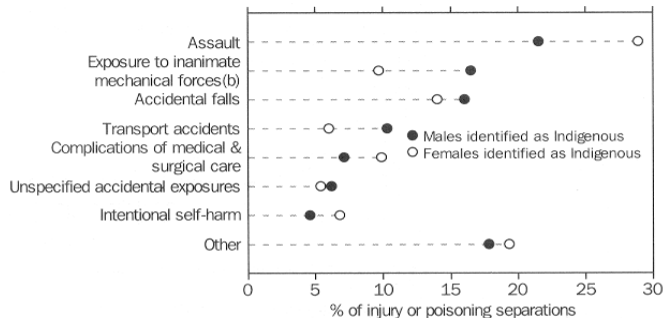

(a) Data are from public and most private hospitals. Cause of injury is based on the first reported external cause where the principal diagnosis was 'injury, poisoning and certain other consequences of external causes'.

(b) Includes injuries due to accidental contact with machinery or other objects, accidental discharge from firearms, explosions, & exposure to noise.

Source: AIHW National Hospital Morbidity Database.

## Intervention graph

HOSPITAL SEPARATIONS, Cause of Injury or Poisoning(a)—1998-99

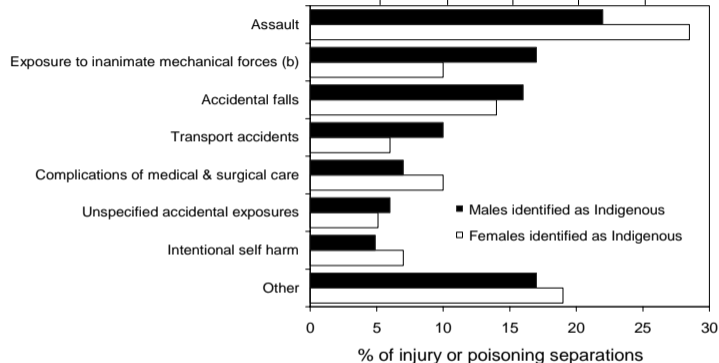

(a) Data are from public and most private hospitals. Cause of injury is based on the first reported external cause where the principal diagnosis was 'injury, poisoning and certain other consequences of external causes'.

(b) Includes injuries due to accidental contact with machinery or other objects, accidental discharge from firearms, explosions, & exposure to noise.

Source: AIHW National Hospital Morbidity Database.
